# Supplementary material for: Early indicators of exposure to biological threat agents using host gene profiles in peripheral blood mononuclear cells
Source: Springer Nature journal article supplement (doi:10.1186/1471-2334-8-104), 2008-07-30
Supplement: Additional file 3 [file 1471-2334-8-104-s3.pdf]

| Gene Name                                                                 | Gene ID                  |
|---------------------------------------------------------------------------|--------------------------|
| interferon gamma precursor (IFN-gamma; IFNG); immune inte                 | X01992; M29383           |
| myeloblastin precursor (MBN); leukocyte proteinase 3 (PRTN                | M29142                   |
| cell surface glycoprotein MUC18; melanoma-associated antig                | M28882                   |
| kidney glomeruli chloride channel; CIC-5                                  | X91906                   |
| ephrin type-A receptor 2 precursor; epithelial cell kinase (ECK           | M59371 M36395            |
| selenium-binding protein                                                  | U29091                   |
| complement component 5 (C5)                                               | M65134                   |
| inhibin alpha subunit precursor (INHA)                                    | M13981                   |
| 14-3-3 protein beta/alpha; protein kinase C inhibitor protein-1 (         | X57346                   |
| YL-1 protein                                                              | D43642                   |
| apolipoprotein E precursor (APOE)                                         | M12529                   |
| Rad50                                                                     | U63139                   |
| NADH-ubiquinone oxidoreductase B18 subunit; complex I-B18                 | M33374                   |
| tristetraproline (TTP); TIS11; ZFP36; growth factor-inducible n           | M92843                   |
| matrix metalloproteinase 11 (MMP11); stromelysin 3                        | X57766                   |
| TRF1-interacting ankyrin-related ADP-ribose polymerase tank               | AF082556                 |
| neuronal acetylcholine receptor protein beta 4 subunit precurs            | U62439                   |
| voltage-gated potassium channel                                           | Y15065                   |
| photolyase/blue-light receptor homolog                                    | D84657                   |
| angiotensin-converting enzyme (ACE)                                       | A00914                   |
| erythropoietin receptor (EPOR)                                            | M60459                   |
| acidic fibroblast growth factor (AFGF) + heparin-binding growtl           | X65778 + X51943 + M13361 |
| macMARCKS; MARCKS-related protein (MRP); MLP                              | X70326                   |
| cyclic-AMP-dependent transcription factor atr-1; TREB36 prote             | X55544                   |
| transcription factor ZFM1                                                 | D26120                   |
| PCAF-associated factor 65 alpha                                           | AF069735                 |
| defensin 6 precursor                                                      | M98331                   |
| CXC chemokine precursor                                                   | AJ002211                 |
| fasL receptor; apoptosis-mediating surface antigen fas; APO-1             | M67454                   |
| pancreatitis-associated protein 1 precursor                               | D13510                   |
| cyclin-dependent kinase 4 inhibitor B (CDKN2B); p14-INK4B; i              | U17075; L36844           |
| vascular endothelial growth factor C precursor (VEGF-C); vas              | U43142                   |
| sodium- & chloride-dependent taurine transporter                          | Z18956                   |
| paraneoplastic encephalomyelitis antigen HUD; HU-antigen D                | M62843                   |
| glutathione S-transferase mu1 (GSTM1; GST1); HB subunit 4; X68676; S01719 |                          |
| homeobox protein HOX-D3; HOX-4A                                           | D11117                   |
| interleukin-3 precursor (IL-3); multipotential colony-stimulating         | M14743; M17115           |
| melanotransferrin precursor; melanoma-associated antigen p9               | M12154                   |
| epithelial discoidin domain receptor 1 precursor (EDDR1; DDF              | X74979                   |
| cadherin 8 (CDH8)                                                         | L34060                   |
| Ink adaptor protein                                                       | AF055581                 |
| lactotransferrin precursor; lactoferrin                                   | X53961                   |
| thiosulfate sulfurtransferase; rhodanese                                  | D87292                   |
| endothelin 2 (ET2)                                                        | M65199                   |
| protein-tyrosine phosphatase 1E                                           | L34583                   |
| dimethylaniline monooxygenase (N-oxide forming) 1 (EC 1.14. M64082        |                          |
| tissue inhibitor of metalloproteinases 2 (TIMP2); metalloproteir          | J05593                   |
| LYL-1 protein                                                             | M22637                   |
| myelin-associated glycoprotein precursor (MAG)                            | M29273                   |
