# Supplementary material for: Early indicators of exposure to biological threat agents using host gene profiles in peripheral blood mononuclear cells
Source: Springer Nature journal article supplement (doi:10.1186/1471-2334-8-104), 2008-07-30
Supplement: Additional file 4 [file 1471-2334-8-104-s4.pdf]

| <b>Gene Name</b> | <b>Full Name</b>                   | <b>GenBank</b> | <b>Sequence</b>                                             |
|------------------|------------------------------------|----------------|-------------------------------------------------------------|
| GBP              | guanine-nucleotide binding protein | M36429         | F-GACTCAAGGCTGCTGGTCA<br>R-AAGCGGCAACACGACAGGTA             |
| HIF1             | hypoxia-inducible factor-1 alpha   | U22431         | F-AATGATGTAATGCTCCCC<br>R-TTCTATGACTCCTTTTCCTG              |
| 18s              | 18s ribosomal protein              | M10098         | F-AATTGACGGAAGGGCACCAC<br>R-CGGACATCTAAGGGCATCACAG          |
| C5AR             | C5 anaphylatoxin receptor          | M62505         | F-CCACGCGGTCCACCAAGACACTCAAGG<br>R-GTGGCCCATGAGGCTGTCGCCTAC |

**Product Size**

257

741

316

373
